# Supplementary material
Source: publisher figshare collection journal article supplement (https://acs.figshare.com/ndownloader/files/4140985)
Supplement: Supplementary file 1 [file 4140985]

# Supporting Information

## Pulsed laser deposition of CdSe quantum dots on $\text{Zn}_2\text{SnO}_4$ nanowires and their photovoltaic applications

Qilin Dai, Jiajun Chen, Liyou Lu, Jinke Tang, and Wenyong Wang\*

Department of Physics & Astronomy, University of Wyoming, Laramie, WY 82071

\*Email: [wwang5@uwyo.edu](mailto:wwang5@uwyo.edu) (Wenyong Wang)

### 1. SEM and TEM images of $\text{Zn}_2\text{SnO}_4$ nanowires

Figure S1(a) is the SEM image of a typical axially periodic  $\text{Zn}_2\text{SnO}_4$  nanowire. Figure S1(b) shows the schematic of a  $\text{Zn}_2\text{SnO}_4$  nanowire formed by periodic rhombohedral crystals that are enclosed by  $\{111\}$  equivalent facets. Figure S1(c) is the TEM image of a  $\text{Zn}_2\text{SnO}_4$  nanowire, and the growth direction is along  $[1\bar{1}1]$ . Figure S1(d)-(f) are enlarged images of the corresponding areas in (c), exhibiting the single crystal structure of the nanowire.

### 2. Pulsed Laser Deposition System

Figure S2(a) shows the schematic of the pulsed laser deposition system. Adjustable growth parameters include laser fluence, chamber pressure, substrate temperature, and deposition time. Figure S2(b) shows the dependence of our Nd:YAG laser output energy on the pumping energy. The lowest laser fluence in our experiment ( $6.4 \text{ J/cm}^2$ ) was achieved using a pumping energy of 28 J, which was close to the onset of output energy generation in our system.

### 3. Lattice parameter calculation

Figure S3(a) shows the calculation results of lattice parameters of CdSe QDs on Zn<sub>2</sub>SnO<sub>4</sub> nanowire and amorphous carbon film after SAED measurement. Figure S3(b) shows the calculation results of lattice parameters of Zn<sub>2</sub>SnO<sub>4</sub> nanowire after SAED measurement.

#### 4. PLD-coated QD size distribution

Figure S4(a) & (b) are the TEM image and corresponding size distribution of the QDs deposited using a low laser fluence of 6.4 J/cm<sup>2</sup>, while 3(c) & (d) are the results from a high laser fluence of 12.6 J/cm<sup>2</sup>. The Gaussian fittings for the size distributions are given by solid lines.

#### 5. QDSSC fabrication flow

Figure S5 shows the fabrication process flow of QDSSCs based on PLD-coated quantum dots.

#### 6. Calculation of the driving force

The driving force can be calculated using the following equation:<sup>1</sup>

$$\begin{aligned}\Delta G &= \Delta G_{\text{electronic}} + \Delta G_{\text{coulomb}} + \Delta G_{\text{charging}} \\ &= E_{\text{MO}} - E_{\text{1Se}} + (1 + C) \frac{e^2}{\epsilon_{\text{QD}} R_{\text{QD}}} + \frac{e^2}{2R_{\text{QD}}} \left( \frac{1}{\epsilon_{\text{EL}}} + \frac{C}{\epsilon_{\text{QD}}} \right) - \frac{e^2}{4\epsilon_{\text{EL}} (R_{\text{QD}} + h)} \frac{\epsilon_{\text{MO}} - \epsilon_{\text{EL}}}{\epsilon_{\text{MO}} + \epsilon_{\text{EL}}}, \\ &\approx E_{\text{MO}} - E_{\text{1Se}} + 2.2 \frac{e^2}{\epsilon_{\text{QD}} R_{\text{QD}}}\end{aligned}$$

where  $\Delta G_{\text{electronic}}$ ,  $\Delta G_{\text{coulomb}}$ , and  $\Delta G_{\text{charging}}$  represent the electronic energy, coulomb interaction, and electron charging contributions to the total driving force, respectively;  $E_{\text{MO}}$  and  $E_{\text{1Se}}$  are electron energies at the conduction band edges of the metal oxide and QD, respectively;  $C$  is a constant and is equal to 0.786;  $\epsilon_{\text{MO}}$ ,  $\epsilon_{\text{QD}}$  and  $\epsilon_{\text{EL}}$  are the dielectric constants of the metal oxide, QD, and the polysulfide electrolyte, respectively;  $R_{\text{QD}}$  is the radius of the QD; and  $h$  is the separation distance. Since the water-based electrolyte has a much higher dielectric constant than

those of the metal oxide and QD, the equation is simplified accordingly.<sup>2</sup> To utilize this model for our structures, we first needed to find out the energy band alignment between the PLD-coated QDs and the Zn<sub>2</sub>SnO<sub>4</sub> nanowire. From the TEM structural analysis, the QD size actually did not show significant difference at different laser fluences; however, the onset of the IPCE spectra indicated a bandgap decrease for the QDs prepared using higher laser fluences. This observation could be explained by the formation of interconnecting QDs that caused a decrease in the effective energy bandgaps of the CdSe QD films. Using the onset photon energies in the IPCE spectra as the effective bandgaps of the CdSe QD films, we could outline the energy band alignment and estimate the driving force accordingly. The onset energy was defined as the lowest photon energy where the IPCE efficiency was larger than 3 times of the standard deviation of the background noise. Figure S6 shows the band alignment between Zn<sub>2</sub>SnO<sub>4</sub> nanowire and CdSe QDs coated with laser fluences of 6.4, 7.6, and 9.6 J/cm<sup>2</sup>. Since in CdSe the effective mass of the hole is much larger than that of the electron, the bandgap increase was mainly manifested by the upward shift of the conduction band edge.<sup>1,3</sup> Under these assumptions the driving force for the QDs deposited using laser fluences of 6.4, 7.6, and 9.6 J/cm<sup>2</sup> was calculated to be 0.47, 0.32, and 0.25 eV, respectively, which showed a decrease for the samples prepared with increasing laser fluences.

#### References:

- (1) Tvrđy, K.; Frantsuzov, P. A.; Kamat, P. V. *PNAS* **2011**, *108*, 29–34.
- (2) Wang, P.; Anderko, A. *Fluid Phase Equilibria* **2001**, *186*, 103–122.
- (3) Tvrđy, K. Electron Transfer Reactions in Quantum Dot Sensitized Solar Cells. Ph.D. Dissertation, University of Notre Dame: United States - Indiana, 2011.

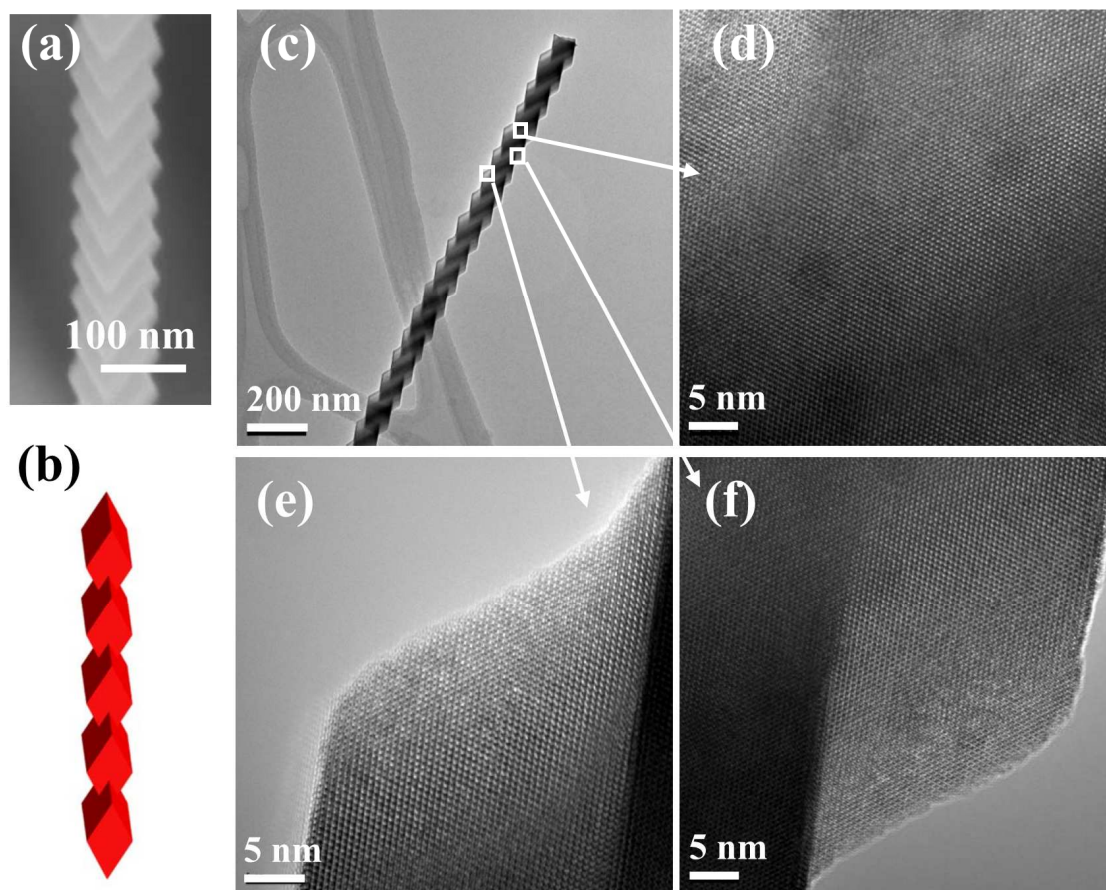

**Figure S1**

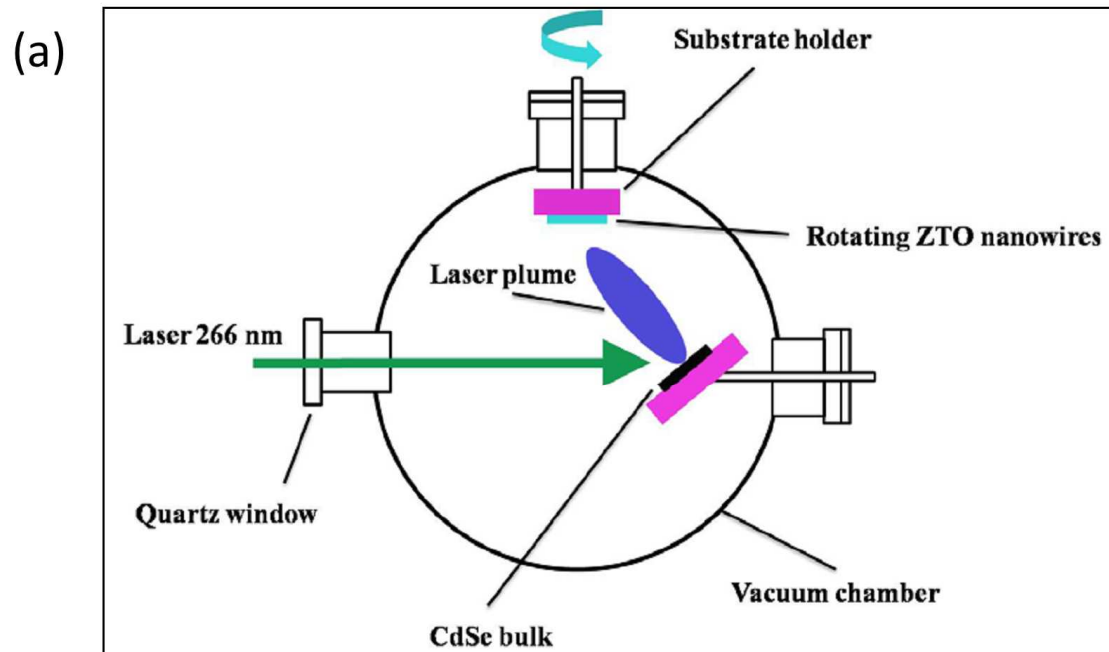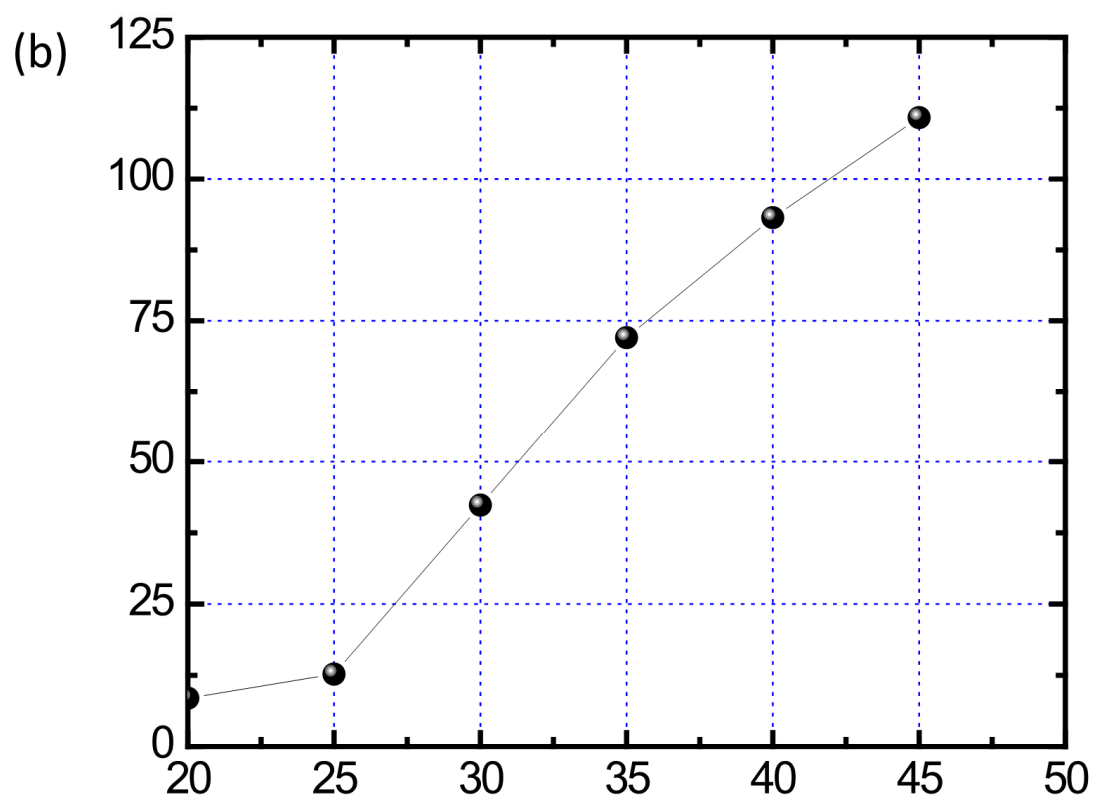

Figure S2

**(a)**

| $hkl$                                                 | $R_{hkl}$ (mm) | $\left(\frac{R_{hkl}}{R_{111}}\right)^2$<br>Measured | $\left(\frac{R_{hkl}}{R_{111}}\right)^2$<br>Theoretical | $a$ (Å) |
|-------------------------------------------------------|----------------|------------------------------------------------------|---------------------------------------------------------|---------|
| CdSe QDs on Zn <sub>2</sub> SnO <sub>4</sub> nanowire |                |                                                      |                                                         |         |
| 111                                                   | 6.745          | 1                                                    | 1                                                       | 6.091   |
| 220                                                   | 11.016         | 2.666                                                | 2.667                                                   | 6.090   |
| 311                                                   | 12.945         | 3.682                                                | 3.667                                                   | 6.077   |
| CdSe QDs on amorphous carbon film                     |                |                                                      |                                                         |         |
| 111                                                   | 6.728          | 1                                                    | 1                                                       | 6.086   |
| 220                                                   | 11.060         | 2.702                                                | 2.667                                                   | 6.066   |
| 311                                                   | 12.592         | 3.503                                                | 3.667                                                   | 6.074   |

**(b)**

| $hkl$ | $R_{hkl}$ (mm) | $\left(\frac{R_{hkl}}{R_{111}}\right)^2$<br>Measured | $\left(\frac{R_{hkl}}{R_{111}}\right)^2$<br>Theoretical | $a$ (Å) |
|-------|----------------|------------------------------------------------------|---------------------------------------------------------|---------|
| 111   | 4.734          | 1                                                    | 1                                                       | 8.678   |
| 200   | 5.477          | 1.339                                                | 1.333                                                   | 8.662   |
| 220   | 7.786          | 2.705                                                | 2.667                                                   | 8.616   |
| 311   | 9.115          | 3.707                                                | 3.667                                                   | 8.631   |
| 331   | 11.945         | 6.367                                                | 6.333                                                   | 8.655   |

**Figure S3**

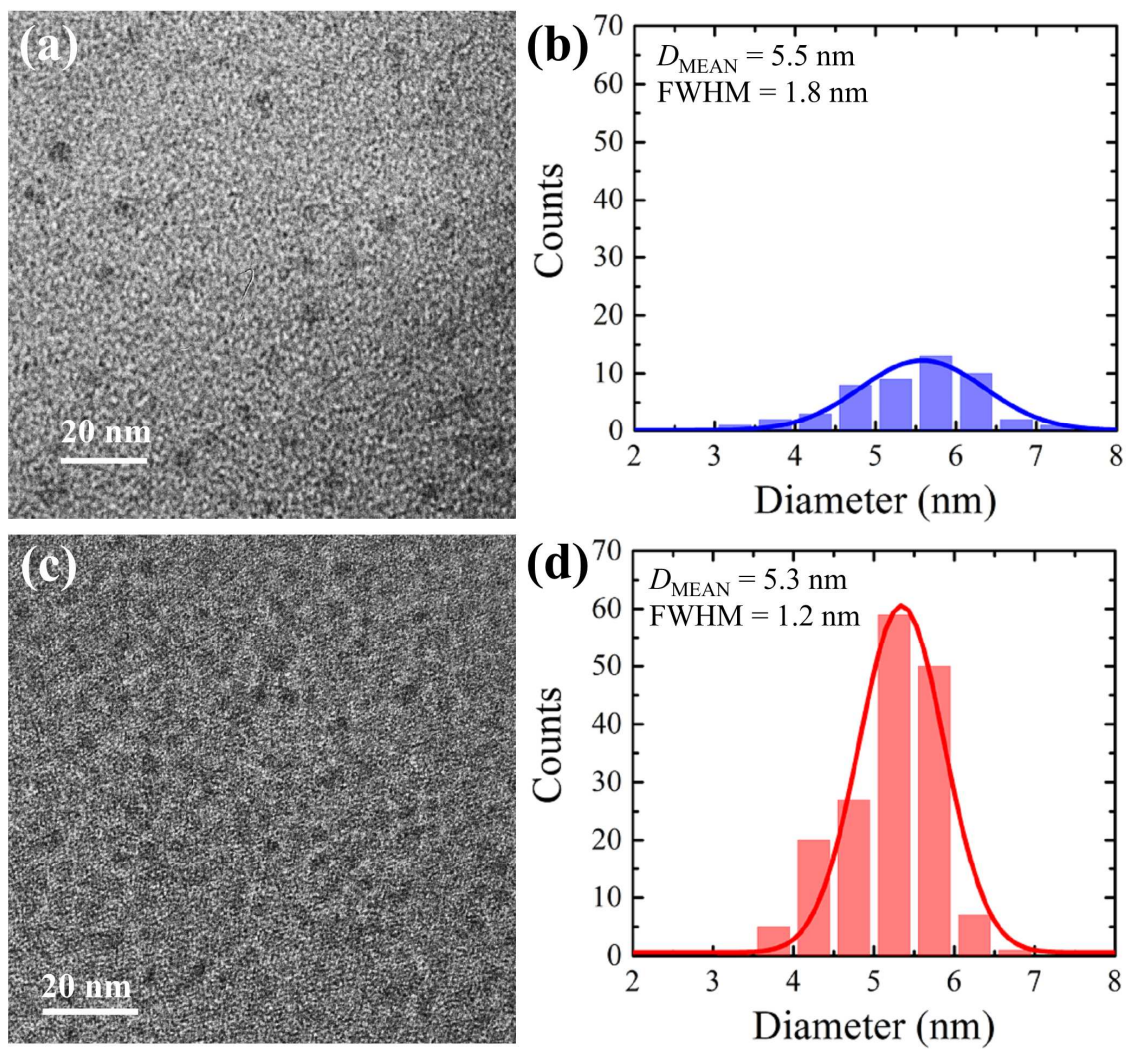

**Figure S4**

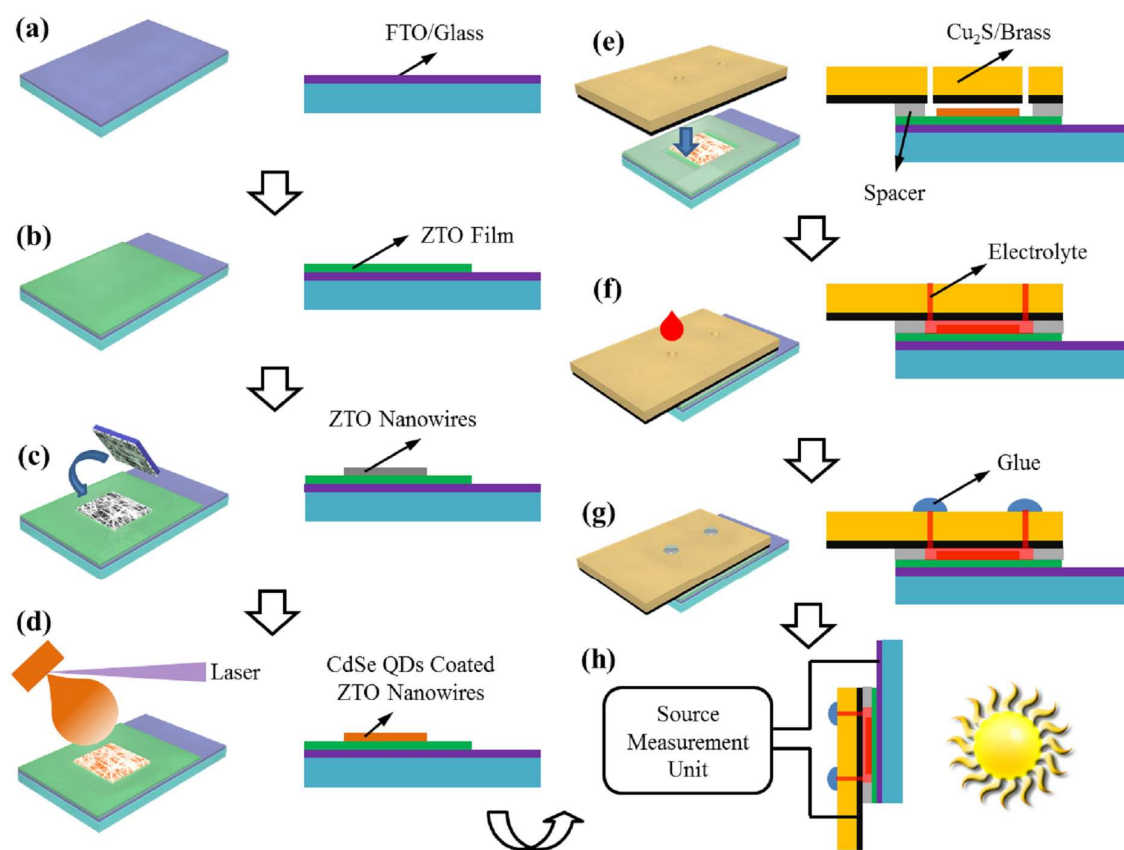

**Figure S5**



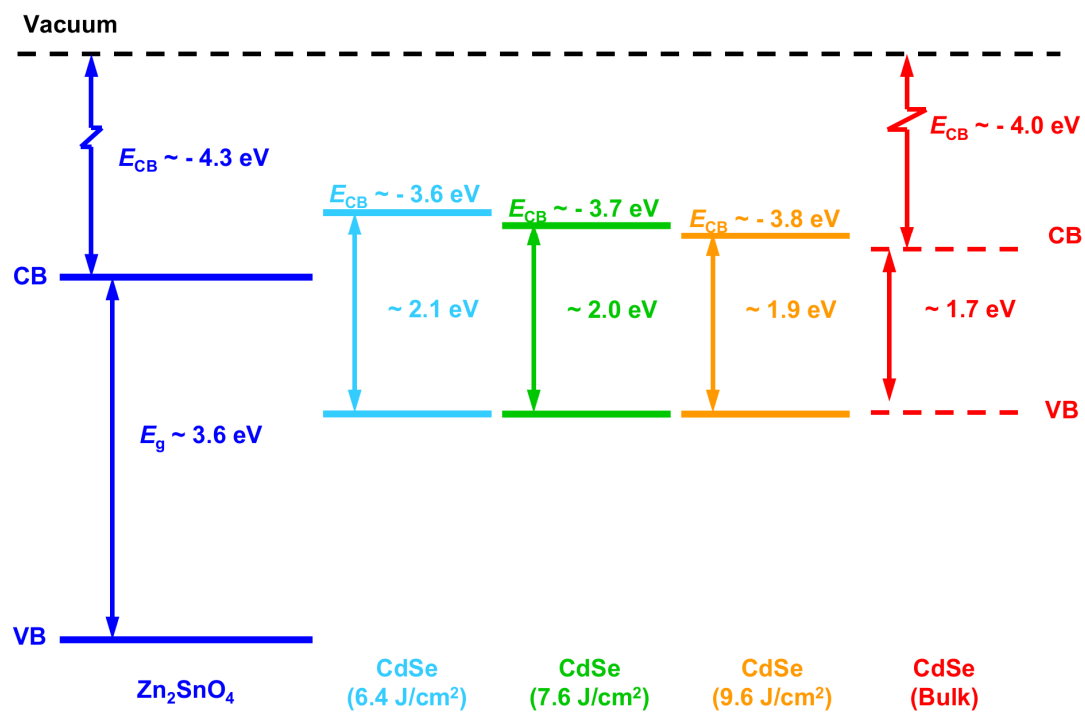

Figure S6
